# Supplementary material for: Ship-based estimates of momentum transfer coefficient over sea ice and recommendations for its parameterization
Source: Copernicus journal article supplement (doi:10.5194/acp-2021-705), 2021-10-22
Supplement: Supplementary file 1 [file acp-2021-705-supplement.pdf]

Supplementary material

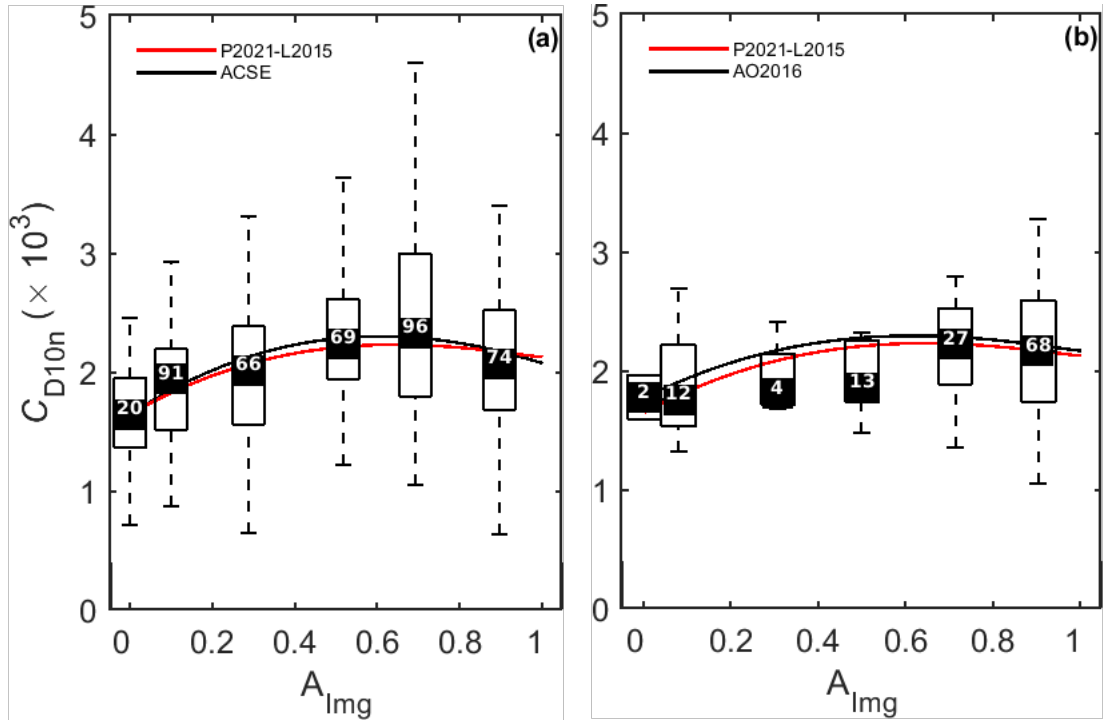

**Figure. S1**  $C_{D10n}$  as a function of  $A_{Img}$  for the (a) ACSE ( $n = 416$ ) and (b) AO2016 ( $n = 126$ ) datasets. In each panel, the proposed parameterizations (black lines) are presented with the L2015 form anchored at the values of  $C_{D10nw}$  ( $A_{Img} = 0$ ) and  $C_{D10ni}$  ( $A_{Img} > 0.8$ ) from the data shown in the respective panels with coefficients  $\beta$  and  $c_c$  shown in Table 1, while the red line shows the fit to the joint dataset as in Figure 8 (P2021-L2015).
